# Supplementary material for: Mechanistic insights into CO2 conversion to CO using cyano manganese complexes
Source: Royal Society of Chemistry journal article supplement (doi:10.1039/d3dt00891f), 2023-01-01
Supplement: d3dt00891f1.pdf [file d3dt00891f1.pdf]

## Supplementary Information

### Mechanistic Insights into CO<sub>2</sub> Conversion to CO

#### Using Cyanide Manganese Complexes

Kailyn Y. Cohen, Delaan G. Nedd, Rebecca Evans, and Andrew B. Bocarsly\*

Department of Chemistry, Frick Laboratory, Princeton University, Princeton, New Jersey, United States

\*Email: bocarsly@princeton.edu

#### Contents

|                                                                                                                |        |
|----------------------------------------------------------------------------------------------------------------|--------|
| Solid-state ATR-IR spectra of <b>MnBr</b> , <b>MnCN</b> , <b>MnBr(mesbpy)</b> , and <b>MnCN(mesbpy)</b> .....  | S2     |
| <sup>1</sup> H NMR of <b>MnCN(mesbpy)</b> and <b>MnCN</b> .....                                                | S2     |
| <sup>13</sup> C NMR spectrum in DMSO-d <sub>6</sub> of <b>MnCN(mesbpy)</b> .....                               | S3     |
| Difference liquid phase IR spectrum of <b>MnCN</b> .....                                                       | S3     |
| UV-vis of <b>MnCN</b> under irradiation in aerobic conditions.....                                             | S4     |
| Liquid phase IR of <b>MnCN</b> and PPh <sub>3</sub> .....                                                      | S5     |
| <sup>31</sup> P NMR of <b>MnCN</b> and PPh <sub>3</sub> .....                                                  | S6     |
| UV-vis spectra of a mixture of <b>s-MnCN</b> and <b>MnCN</b> .....                                             | S6     |
| Liquid phase IR spectra of <b>MnCN(mesbpy)</b> after irradiation.....                                          | S7     |
| Liquid phase IR spectra of <b>MnBr(mesbpy)</b> after irradiation.....                                          | S7     |
| CV of <b>MnCN(mesbpy)</b> at different scan rates.....                                                         | S8     |
| Nicholson and Shain Diagnostics for <b>MnCN(mesbpy)</b> .....                                                  | S9-11  |
| <sup>1</sup> H NMR spectrum in CDCl <sub>3</sub> of 4-hour bulk electrolysis from <b>MnCN(mesbpy)</b> .....    | S11    |
| Liquid phase IR spectra of a pristine sample of <b>MnBr</b> and [Mn(bpy)(CO) <sub>3</sub> ] <sup>-</sup> ..... | S12    |
| Example Corrected Quantum Yield Calculation.....                                                               | S12    |
| X-ray diffraction analysis data for <b>MnCN(mesbpy)</b> .....                                                  | S12-14 |

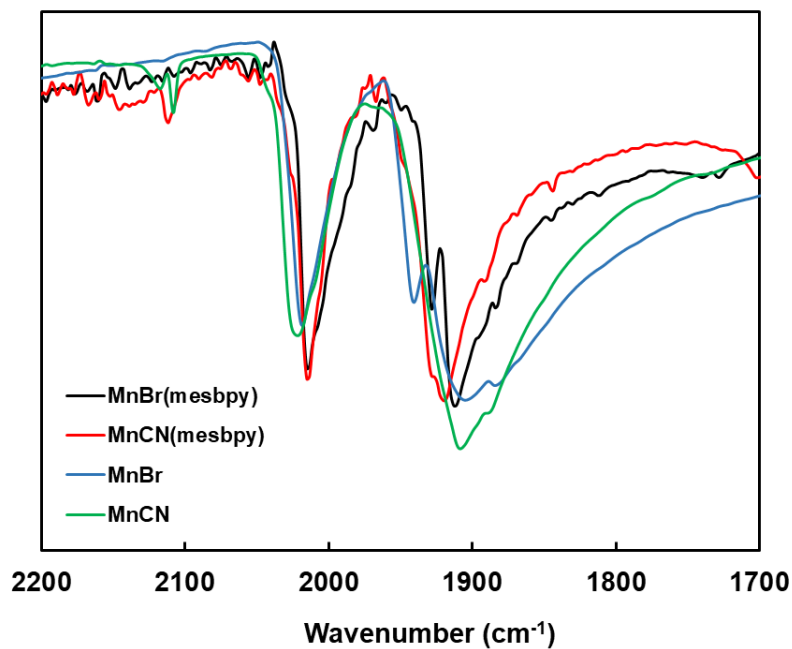

**Figure S1.** Solid-state ATR-IR spectra of **MnBr**, **MnCN**, **MnBr(mesbpy)**, and **MnCN(mesbpy)**. Both **MnCN** and **MnCN(mesbpy)** have terminal CN-peaks at 2115  $\text{cm}^{-1}$ .

a)

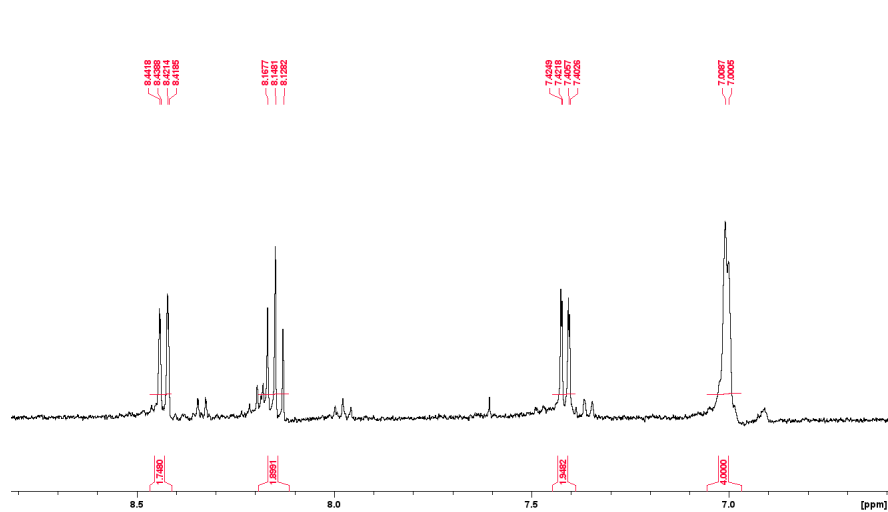

b)

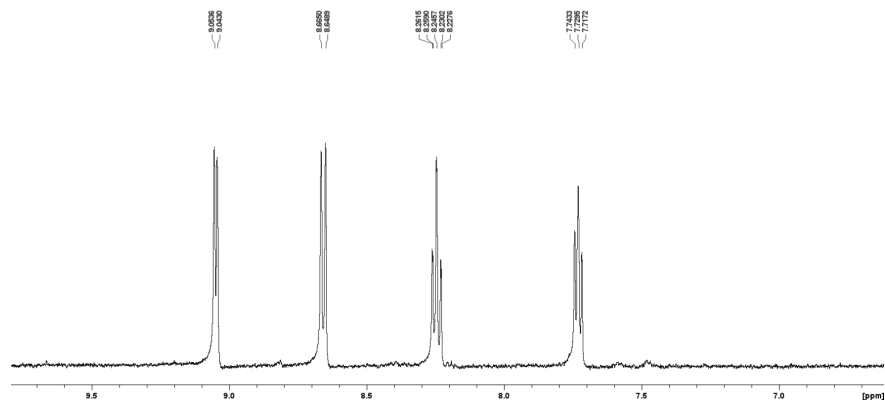

**Figure S2.** Aromatic region of the  $^1\text{H}$  NMR of a) **MnCN(mesbpy)** in d-MeCN b) **MnCN** in DMSO- $d_6$ .

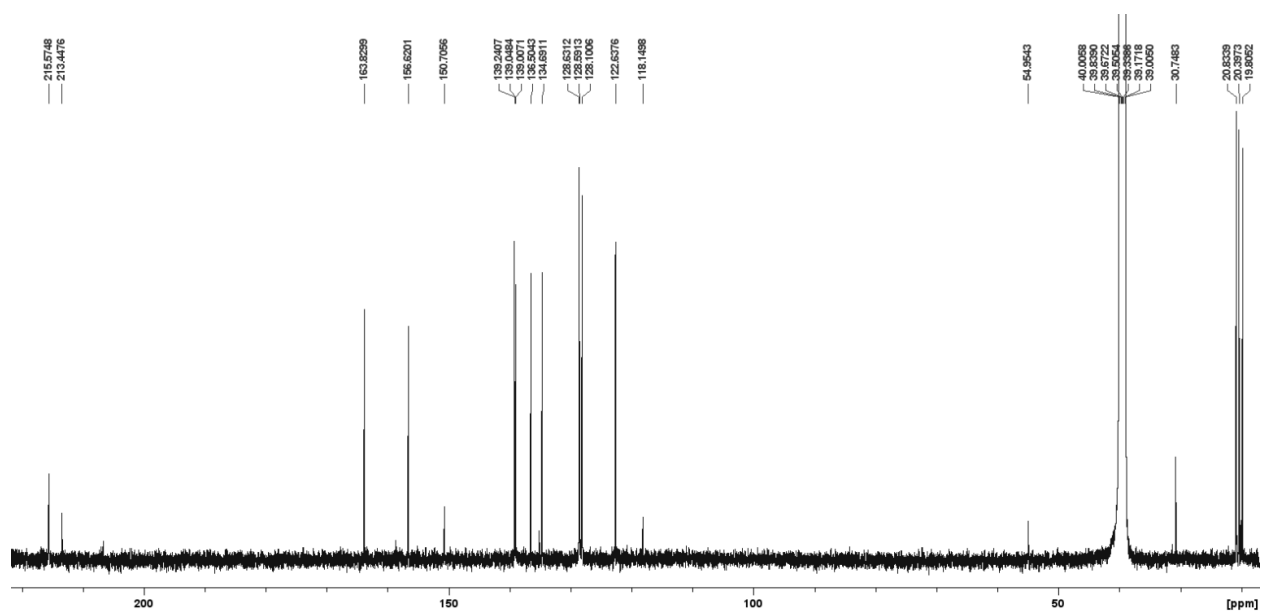

**Figure S3.** The carbonyl resonance region of the  $^{13}\text{C}$  NMR spectrum in DMSO- $d_6$  of **MnCN(mesbpy)**, showing two carbonyl carbons at 215.5 ppm and one carbonyl carbon at 213.5 ppm. The terminal cyanide carbon is located at 163.8 ppm.

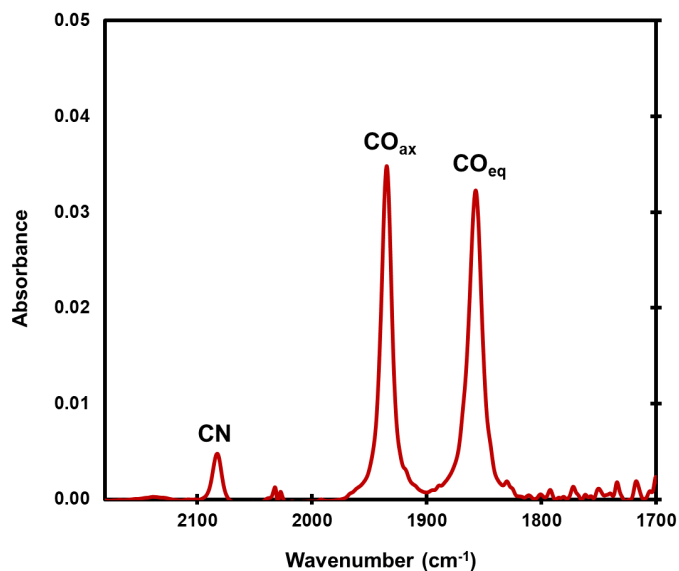

**Figure S4.** A difference liquid phase IR spectrum of **MnCN** after 5 s of irradiation at 395 nm, showing the formation of s-MnCN.

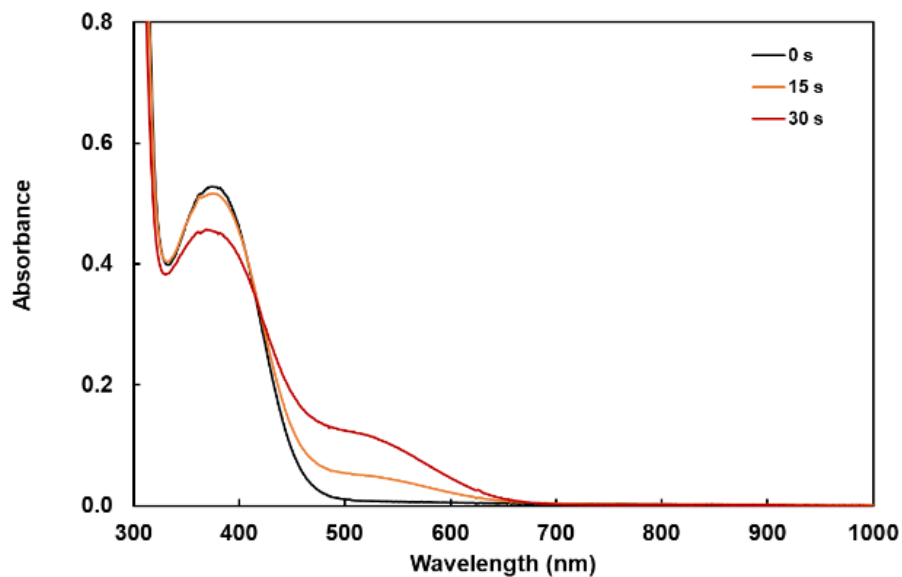

**Figure S5.** **MnCN** in MeCN under aerobic conditions before and after irradiation with a 395 nm LED ( $2.97 \times 10^{-9}$  einstein per s intensity). The increase in the peak at  $\sim 530$  nm is associated with the formation of s-MnCN, while the MLCT band of MnCN at 380 nm decreases.

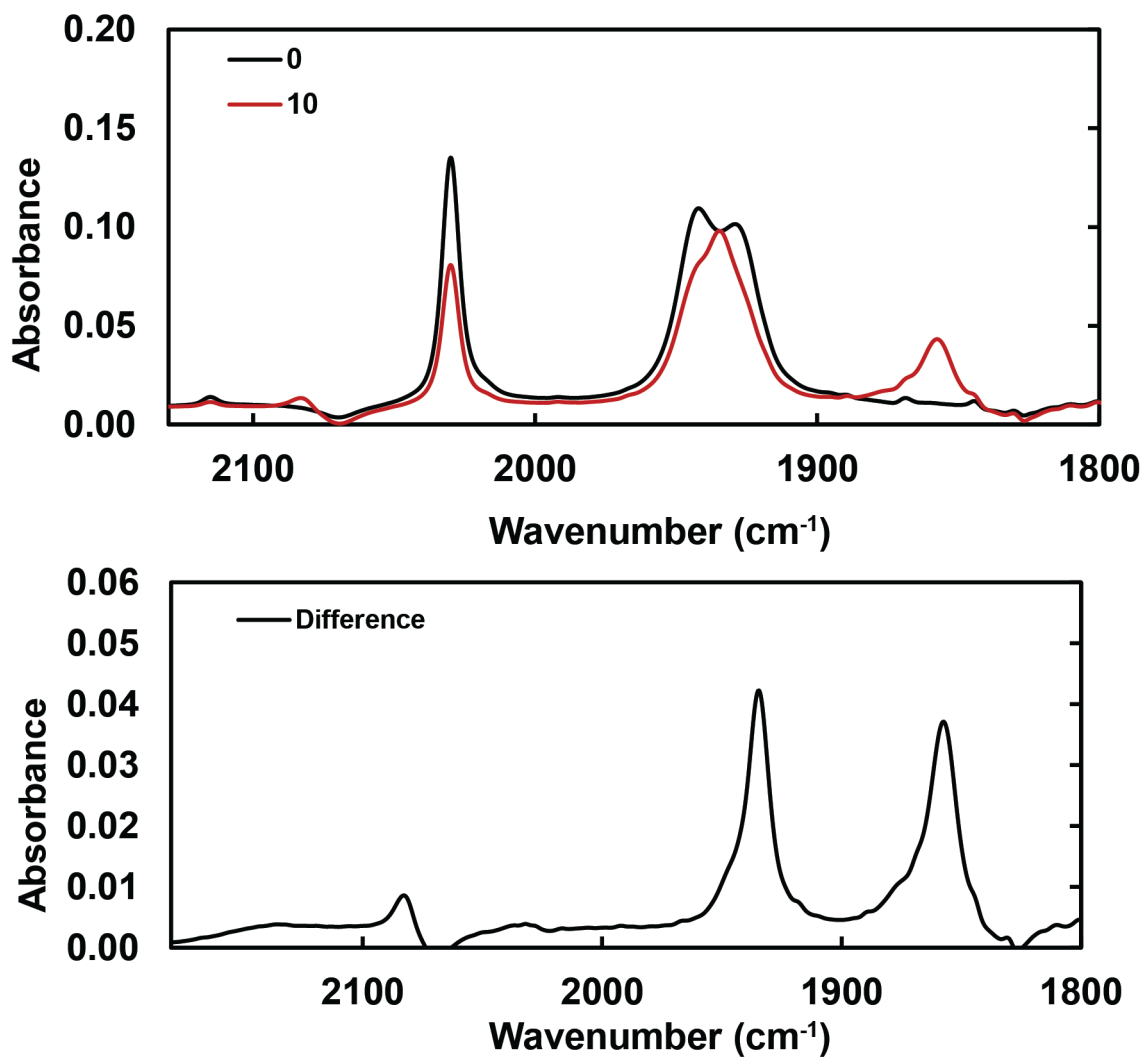

**Figure S6.** Liquid phase IR of a 10:1 mixture of **MnCN** and PPh<sub>3</sub> in dry, degassed MeCN after 10 s of irradiation at 395 nm showing retention of the terminal cyanide ligand. <sup>31</sup>P NMR (below) shows PPh<sub>3</sub> ligation to the Mn center.

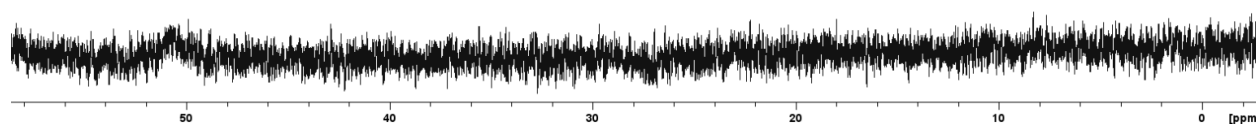

**Figure S7.**  $^{31}\text{P}$  NMR showing  $\text{PPh}_3$  ligation. The NMR sample was prepared by irradiating a 10:1 mixture of  $\text{MnCN}$  and  $\text{PPh}_3$  in dry, degassed d-MeCN for 10 s at 395 nm. Liquid IR (above) confirms retention of the terminal CN ligand.  $^{31}\text{P}$  NMR spectra were referenced to 85%  $\text{H}_3\text{PO}_4$  solution as an external standard in d-MeCN.

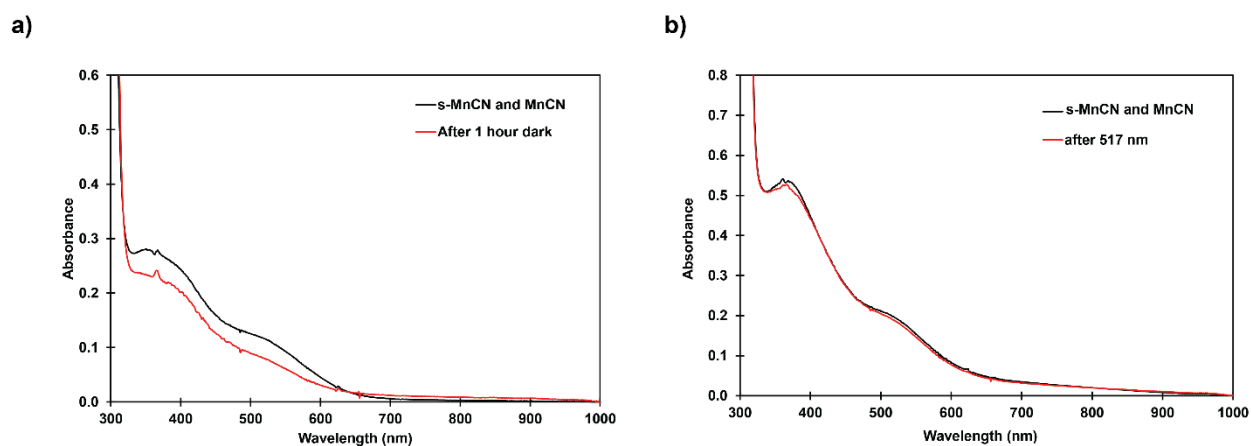

**Figure S8.** UV-vis spectra of a) a mixture of **s-MnCN** and **MnCN** before (black) and after (red) sitting in the dark over the course of 1 hour and b) a mixture of **s-MnCN** and **MnCN** before (black) and after (red) irradiation at 517 nm for 60 s in dry, degassed MeCN.

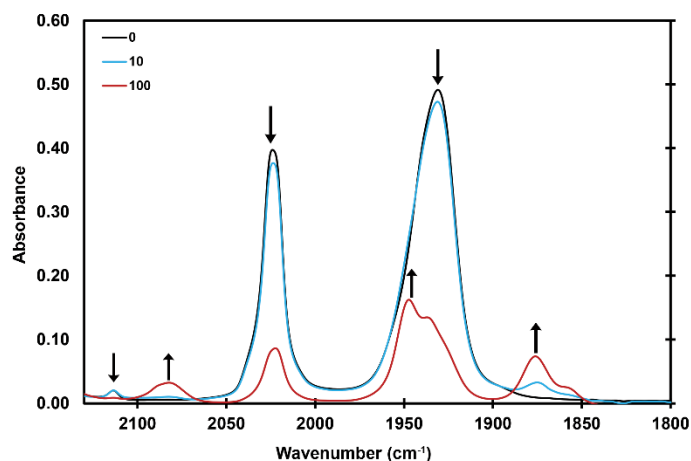

**Figure S9.** Liquid phase IR spectra of **MnCN(mesbpy)** after 100 s of 395 nm irradiation. The terminal cyanide peak at  $2081\text{ cm}^{-1}$  and the two carbonyl peaks at  $1949$  and  $1873\text{ cm}^{-1}$  indicate formation of **s-MnCN(mesbpy)**,<sup>1</sup> where one equatorial CO is replaced by a MeCN solvent ligand.

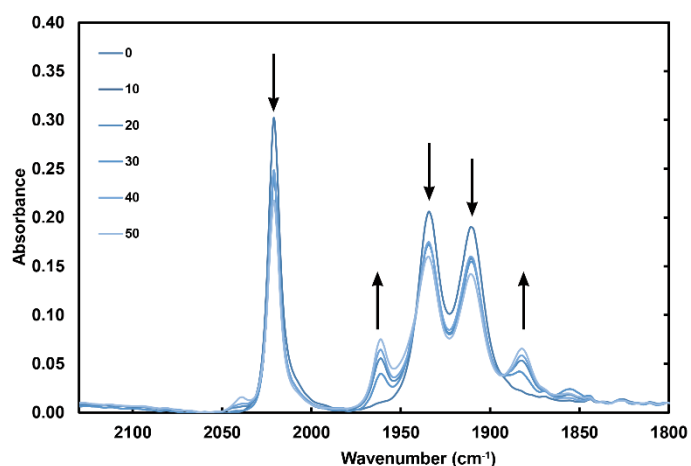

**Figure S10.** Liquid phase IR spectra of **MnBr(mesbpy)** after 50 s of 395 nm irradiation. The two carbonyl peaks at  $1961$  and  $1882\text{ cm}^{-1}$  indicate formation of a bis-acetonitrile species,<sup>1</sup>  $[\text{Mn}(\text{mesbpy})(\text{CO})_2(\text{MeCN})_2]^+$  where the Br ligand and an equatorial CO are replaced by MeCN solvent ligands. The small peak at  $2038\text{ cm}^{-1}$  is assigned to *mer*-MnBr(mesbpy).

## Nicholson and Shain Diagnostics

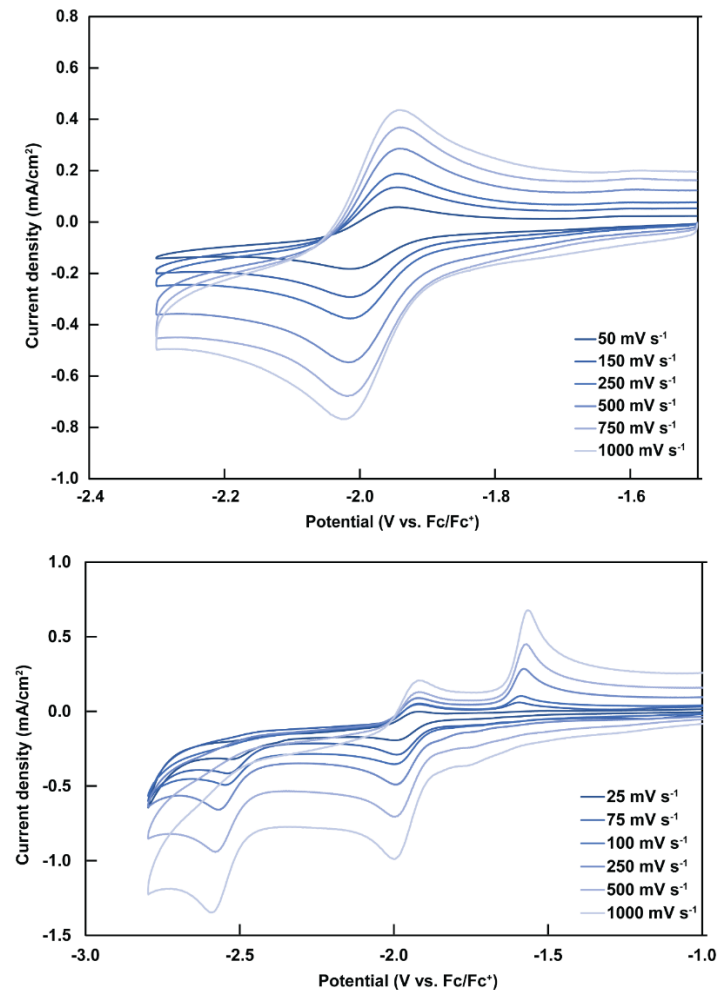

**Figure S11.** Cyclic voltammetry of  $[\text{Mn}(\text{mesbpy})(\text{CO})_3\text{CN}]$  (1 mM) under Ar in dry MeCN with 0.1 M TBAPF<sub>6</sub> supporting electrolyte. The switching potentials were set to  $-2.3$  V vs Fc/Fc<sup>+</sup> (top) and  $-2.9$  V vs Fc/Fc<sup>+</sup> (bottom).

Nicholson and Shain diagnostics were performed for all four peaks, revealing that the first reduction and first oxidation events are reversible, while all four features are diffusion-limited (**Figure S12-14**)



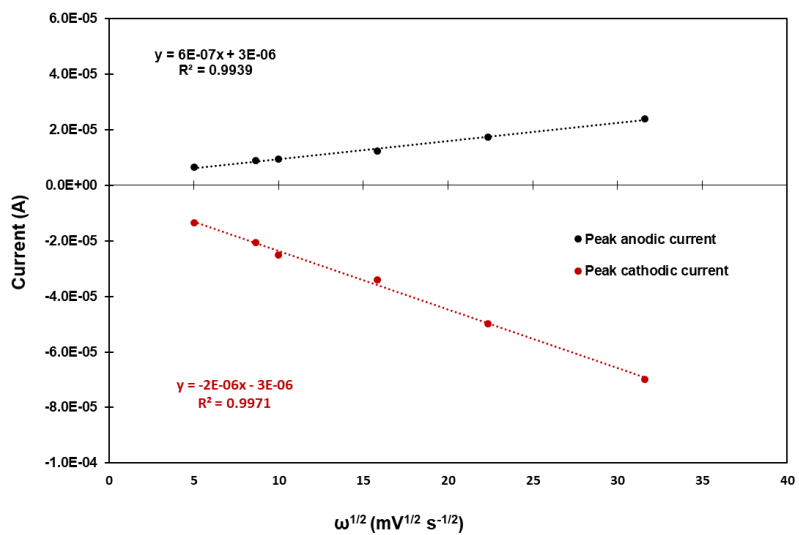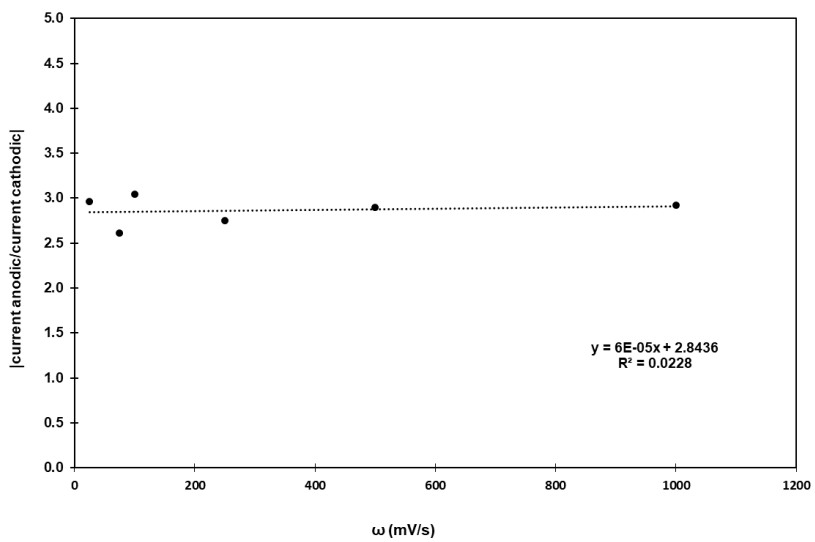

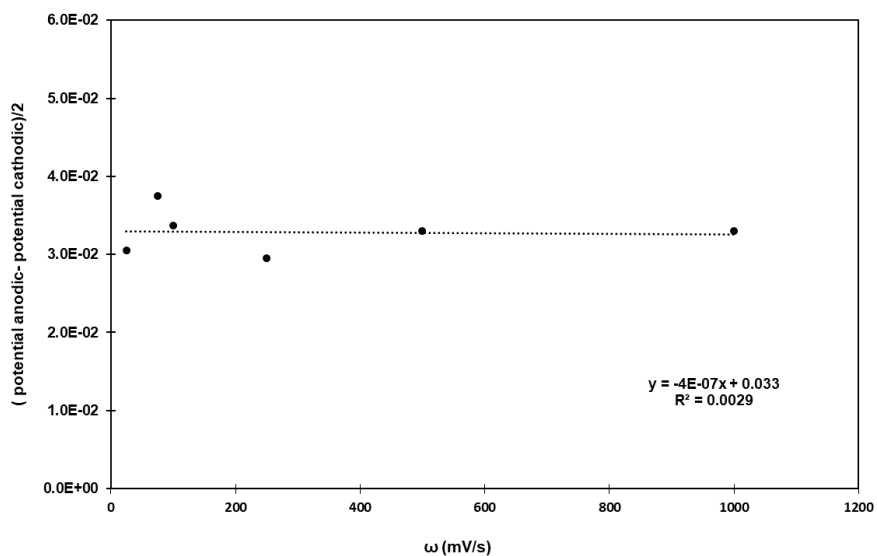

**Figure S12.** Nicholson and Shain Diagnostics for **MnCN(mesbpy)** for the first reduction peak at -1.98 V and the first oxidation peak at -1.91 V vs. Fc/Fc<sup>+</sup>.

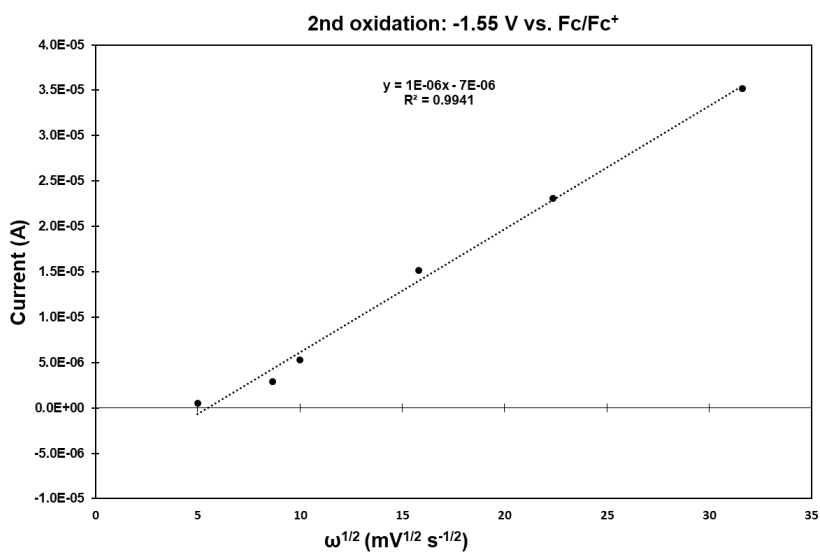

**Figure S13.** Current vs. (scan rate)<sup>1/2</sup> for **MnCN(mesbpy)** for the second oxidation peak at -1.55 V vs. Fc/Fc<sup>+</sup>.

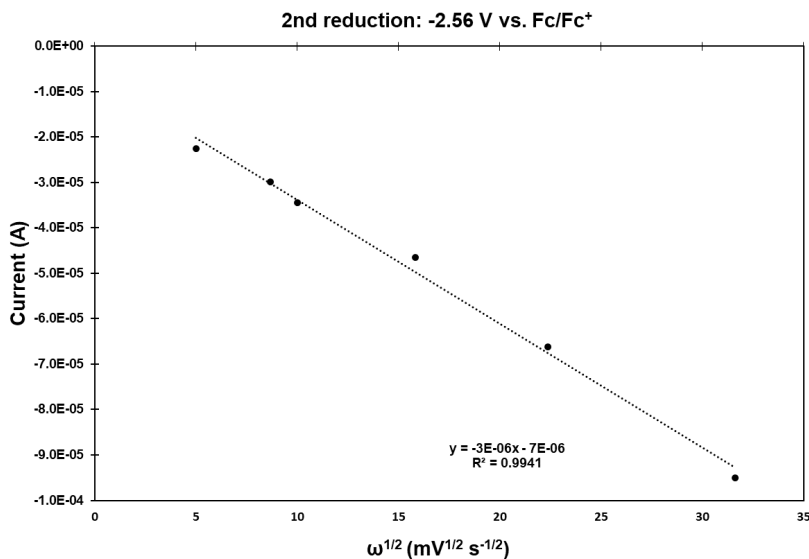

**Figure S14.** Current vs. (scan rate)<sup>1/2</sup> for **MnCN(mesbpy)** for the second reduction peak at -2.56 V vs. Fc/Fc<sup>+</sup>.

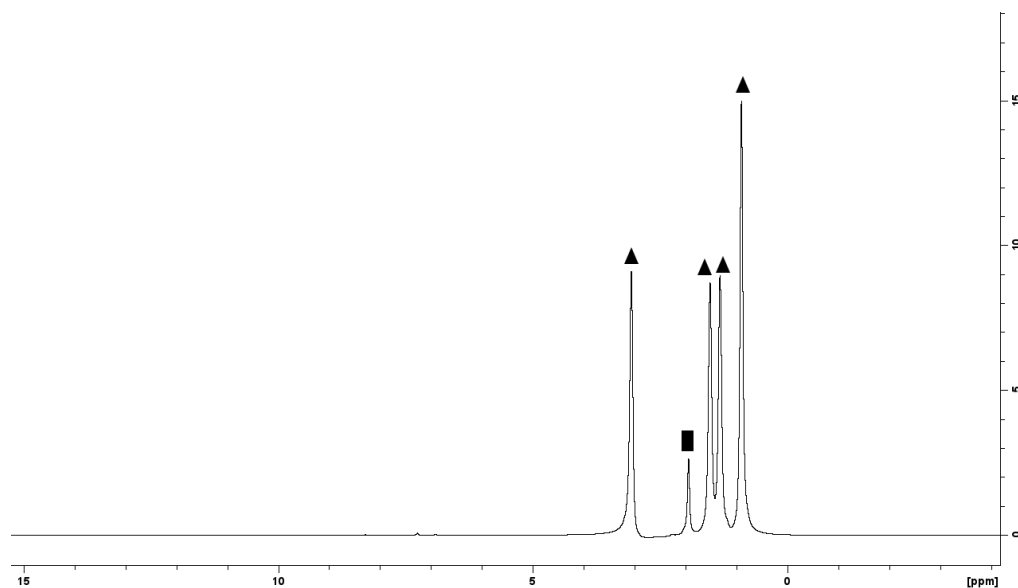

**Figure S15.** A sample <sup>1</sup>H NMR spectrum in CDCl<sub>3</sub> of 4-hour bulk electrolysis run at the second reduction potential of **MnCN(mesbpy)** using 5% v/v H<sub>2</sub>O as the proton source. The MeCN solvent was mostly removed in vacuo, but is indicated with a ■, while the TBAPF<sub>6</sub> supporting electrolyte is indicated by ▲. No formic acid is observed, which would have signals appearing at 10.99 and 8.06 ppm.

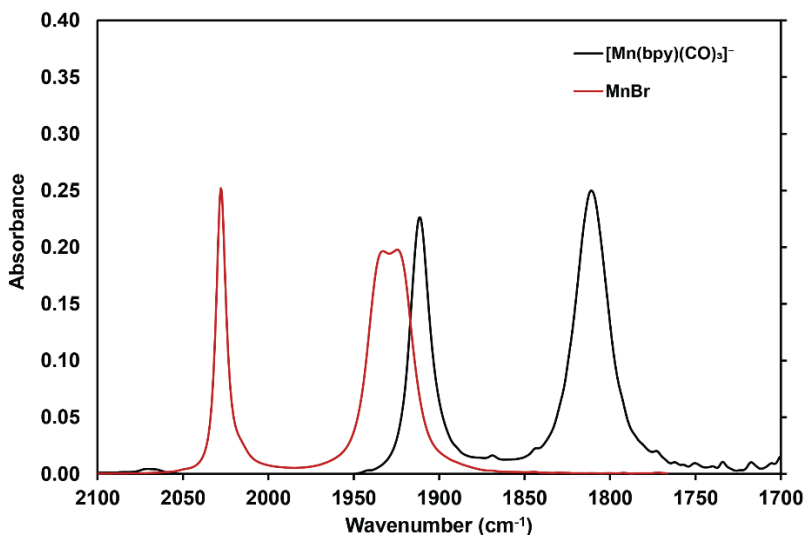

**Figure S16.** Liquid phase IR spectra of a pristine sample of **MnBr** and  $[\text{Mn}(\text{bpy})(\text{CO})_3]^-$  in dry, degassed MeCN.  $[\text{Mn}(\text{bpy})(\text{CO})_3]^-$  was synthesized by added two equivalents of Na(Hg) to a sample of **MnBr** in MeCN.

**Example Quantum Yield Calculation:**

$$\text{Quantum Yield} = \left( \frac{\text{mol CO}}{\frac{(\text{light absorbed, } W)(\text{irradiation time, } s)}{(\text{energy per Einstein})}} \right)$$

$$0.51 = \left( \frac{30.45 \times 10^{-6} \text{ mol CO}}{\frac{(0.00504 \text{ J/s})(3600 \text{ s})}{\left(\frac{hc}{395 \times 10^{-9} \text{ m}}\right) N_A}} \right)$$

$$\text{Corrected Quantum Yield} = \text{Quantum Yield} \times 6.1\%$$

$$0.031 = 0.51 \times 6.1\%$$

Intensity absorbed = 5.04 mW @ 395 nm

Energy per Einstein =  $(hc/395 \text{ E}^{-9} \text{ m}) \cdot N_A$  where  $N_A$  = Avogadro's number

Irradiation time = 3600 s

## X-ray Crystallography

A single crystal suitable for X-ray diffraction analysis of **MnCN(mesbpy)** was isolated by layering diethyl ether over a dichloromethane solution at 298 K, resulting in a translucent pale orange crystal. Single X-ray diffraction data were collected using a Bruker Apex Duo CCD detector using MoK $\alpha$  radiation. SADABS V2014/2 (Bruker AXS Inc.) was used to perform absorption corrections. The frames were integrated with the Bruker SAINT V8.34A software package.

### Collection Data for **MnCN(mesbpy)**

Formula: C<sub>32</sub>H<sub>28</sub>MnN<sub>3</sub>O<sub>3</sub>

Formula Weight: 557.51

Crystal System: monoclinic

Space Group: C 2/c

### Unit Cell Dimensions:

a = 35.058(4) Å

b = 8.1500(9) Å

c = 23.637(3) Å

alpha = 90 degrees

beta = 115.810(4) degrees

gamma = 90 degrees

Cell Volume: 6079.9 Å<sup>3</sup>

Temperature: 100 K

Radiation Type: MoK $\alpha$

Radiation Wavelength: 0.71073 Å

Theta range for data collection: 1.290 degrees to 29.566 degrees

Reflections Collected: 71338

Goodness-of-fit on F<sup>2</sup>: 1.033

### Bond Lengths (Å):

Mn1-N2, 2.099(2)

Mn1-C37, 1.804(3)

Mn1-C35, 1.803(3)

Mn1-C33, 1.832(2)

Mn1-C31, 2.003(2)

Mn1-N7, 2.087(2)

N2-C3, 1.347(4)

N2-C16, 1.358(3)

C3-C4, 1.486(3)

C3-C13, 1.397(4)

C4-C5, 1.396(3)

C4-C11, 1.400(3)

C5-C6, 1.512(3)

C5-C7, 1.392(4)  
C6-H6A, 0.982  
C6-H6B, 0.979  
C6-H6C, 0.981  
O38-C37, 1.150(4)  
O36-C35, 1.143(3)  
O34-C33, 1.143(3)  
N32-C31, 1.150(3)  
C7-H7, 0.95  
C7-C8, 1.393(3)  
N7-C17, 1.371(4)  
N7-C21, 1.342(4)  
C8-C9, 1.503(4)  
C8-C10, 1.379(4)  
C9-H9A, 0.98  
C9-H9B, 0.98  
C9-H9C, 0.98  
C10-H10, 0.95  
C10-C11, 1.386(4)  
C11-C12, 1.511(4)  
C12-H12A, 0.98  
C12-H12B, 0.981  
C12-H12C, 0.979  
C13-H13, 0.95  
C13-C14, 1.367(4)  
C14-H14, 0.951  
C14-C15, 1.367(5)  
C15-H15, 0.95  
C15-C16, 1.405(4)  
C16-C17, 1.451(5)  
C17-C18, 1.392(3)  
C18-H18, 0.95  
C18-C19, 1.367(5)  
C19-H19, 0.95  
C19-C20, 1.374(5)  
C20-H20, 0.95  
C20-C21, 1.401(4)  
C21-C22, 1.497(4)  
C22-C23, 1.401(4)  
C22-C29, 1.391(3)  
C23-C24, 1.507(3)  
C23-C25, 1.379(4)  
C24-H24A, 0.981  
C24-H24B, 0.979  
C24-H24C, 0.98  
C25-H25, 0.95

C25-C26, 1.398(3)  
 C26-C27, 1.498(5)  
 C26-C28, 1.384(5)  
 C27-H27A, 0.979  
 C27-H27B, 0.98  
 C27-H27C, 0.98  
 C28-H28, 0.95  
 C28-C29, 1.393(4)  
 C29-C30, 1.508(5)  
 C30-H30A, 0.98  
 C30-H30B, 0.979  
 C30-H30C, 0.98

Bond Angles (degrees):

|     |     |     |          |
|-----|-----|-----|----------|
| N2  | Mn1 | C37 | 174.3(1) |
| N2  | Mn1 | C35 | 98.6(1)  |
| N2  | Mn1 | C33 | 97.8(1)  |
| N2  | Mn1 | C31 | 84.60(9) |
| N2  | Mn1 | N7  | 78.49(8) |
| C37 | Mn1 | C35 | 81.2(1)  |
| C37 | Mn1 | C33 | 87.9(1)  |
| C37 | Mn1 | C31 | 89.8(1)  |
| C37 | Mn1 | N7  | 101.0(1) |
| C35 | Mn1 | C33 | 91.3(1)  |
| C35 | Mn1 | C31 | 87.8(1)  |
| C35 | Mn1 | N7  | 172.4(1) |
| C33 | Mn1 | C31 | 177.5(1) |
| C33 | Mn1 | N7  | 96.1(1)  |
| C31 | Mn1 | N7  | 84.9(1)  |
| Mn1 | N2  | C3  | 129.0(2) |
| Mn1 | N2  | C16 | 112.2(2) |
| C3  | N2  | C16 | 117.4(2) |
| N2  | C3  | C4  | 121.0(2) |
| N2  | C3  | C13 | 122.2(2) |
| C4  | C3  | C13 | 116.8(2) |
| C3  | C4  | C5  | 119.0(2) |
| C3  | C4  | C11 | 119.6(2) |
| C5  | C4  | C11 | 120.8(2) |
| C4  | C5  | C6  | 121.4(2) |
| C4  | C5  | C7  | 118.7(2) |
| C6  | C5  | C7  | 119.8(2) |
| C5  | C6  | H6A | 109.4    |
| C5  | C6  | H6B | 109.5    |
| C5  | C6  | H6C | 109.5    |

|      |     |      |          |
|------|-----|------|----------|
| H6A  | C6  | H6B  | 109.5    |
| H6A  | C6  | H6C  | 109.5    |
| H6B  | C6  | H6C  | 109.5    |
| Mn1  | C37 | O38  | 170.4(2) |
| Mn1  | C35 | O36  | 171.7(2) |
| Mn1  | C33 | O34  | 173.2(2) |
| Mn1  | C31 | N32  | 178.7(2) |
| C5   | C7  | H7   | 119.3    |
| C5   | C7  | C8   | 121.5(2) |
| H7   | C7  | C8   | 119.3    |
| Mn1  | N7  | C17  | 112.8(2) |
| Mn1  | N7  | C21  | 129.0(2) |
| C17  | N7  | C21  | 117.8(2) |
| C7   | C8  | C9   | 120.7(3) |
| C7   | C8  | C10  | 118.3(3) |
| C9   | C8  | C10  | 121.0(3) |
| C8   | C9  | H9A  | 109.5    |
| C8   | C9  | H9B  | 109.5    |
| C8   | C9  | H9C  | 109.5    |
| H9A  | C9  | H9B  | 109.4    |
| H9A  | C9  | H9C  | 109.5    |
| H9B  | C9  | H9C  | 109.4    |
| C8   | C10 | H10  | 118.8    |
| C8   | C10 | C11  | 122.4(3) |
| H10  | C10 | C11  | 118.8    |
| C4   | C11 | C10  | 118.3(2) |
| C4   | C11 | C12  | 120.7(2) |
| C10  | C11 | C12  | 121.0(3) |
| C11  | C12 | H12A | 109.4    |
| C11  | C12 | H12B | 109.5    |
| C11  | C12 | H12C | 109.4    |
| H12A | C12 | H12B | 109.5    |
| H12A | C12 | H12C | 109.4    |
| H12B | C12 | H12C | 109.5    |
| C3   | C13 | H13  | 120.1    |
| C3   | C13 | C14  | 119.9(3) |
| H13  | C13 | C14  | 120      |
| C13  | C14 | H14  | 120.6    |
| C13  | C14 | C15  | 118.7(3) |
| H14  | C14 | C15  | 120.7    |
| C14  | C15 | H15  | 120.2    |
| C14  | C15 | C16  | 119.6(3) |
| H15  | C15 | C16  | 120.2    |
| N2   | C16 | C15  | 121.8(2) |
| N2   | C16 | C17  | 115.9(2) |



|      |     |      |          |
|------|-----|------|----------|
| C15  | C16 | C17  | 122.3(2) |
| N7   | C17 | C16  | 116.1(2) |
| N7   | C17 | C18  | 122.6(2) |
| C16  | C17 | C18  | 121.4(2) |
| C17  | C18 | H18  | 120.5    |
| C17  | C18 | C19  | 118.9(3) |
| H18  | C18 | C19  | 120.6    |
| C18  | C19 | H19  | 120.5    |
| C18  | C19 | C20  | 119.1(3) |
| H19  | C19 | C20  | 120.4    |
| C19  | C20 | H20  | 119.8    |
| C19  | C20 | C21  | 120.3(3) |
| H20  | C20 | C21  | 119.9    |
| N7   | C21 | C20  | 121.3(3) |
| N7   | C21 | C22  | 121.0(2) |
| C20  | C21 | C22  | 117.7(2) |
| C21  | C22 | C23  | 117.8(2) |
| C21  | C22 | C29  | 121.1(2) |
| C23  | C22 | C29  | 120.8(2) |
| C22  | C23 | C24  | 121.3(2) |
| C22  | C23 | C25  | 118.8(2) |
| C24  | C23 | C25  | 119.9(3) |
| C23  | C24 | H24A | 109.5    |
| C23  | C24 | H24B | 109.5    |
| C23  | C24 | H24C | 109.4    |
| H24A | C24 | H24B | 109.4    |
| H24A | C24 | H24C | 109.4    |
| H24B | C24 | H24C | 109.5    |
| C23  | C25 | H25  | 119      |
| C23  | C25 | C26  | 121.9(3) |
| H25  | C25 | C26  | 119      |
| C25  | C26 | C27  | 120.4(3) |
| C25  | C26 | C28  | 117.8(3) |
| C27  | C26 | C28  | 121.9(3) |
| C26  | C27 | H27A | 109.4    |
| C26  | C27 | H27B | 109.4    |
| C26  | C27 | H27C | 109.5    |
| H27A | C27 | H27B | 109.5    |
| H27A | C27 | H27C | 109.5    |
| H27B | C27 | H27C | 109.5    |
| C26  | C28 | H28  | 119      |
| C26  | C28 | C29  | 122.1(3) |
| H28  | C28 | C29  | 118.9    |
| C22  | C29 | C28  | 118.5(3) |
| C22  | C29 | C30  | 121.6(3) |

|      |     |      |          |
|------|-----|------|----------|
| C28  | C29 | C30  | 119.7(3) |
| C29  | C30 | H30A | 109.5    |
| C29  | C30 | H30B | 109.5    |
| C29  | C30 | H30C | 109.5    |
| H30A | C30 | H30B | 109.4    |
| H30A | C30 | H30C | 109.5    |
| H30B | C30 | H30C | 109.4    |

1. Yempally, V.; Moncho, S.; Hasanayn, F.; Fan, W. Y.; Brothers, E. N.; Bengali, A. A., Ancillary Ligand Effects upon the Photochemistry of Mn(bpy)(CO)<sub>3</sub>X Complexes (X = Br<sup>-</sup>, PhCC<sup>-</sup>). *Inorganic Chemistry* **2017**, *56* (18), 11244-11253.
